# Supplementary material for: Mutagenesis and Functional Analysis of the Pore-Forming Toxin HALT-1 from Hydra magnipapillata
Source: MDPI journal article supplement (doi:10.3390/toxins7020407), 2015-02-03
Supplement: s1 [file s1]

# Supplementary Information

**Table S1.** Prediction of protein stability change in mutants with SDM.

| $\Delta\Delta G$ (kcal/mol) |                     |                        |                        |                      |                    |                    |
|-----------------------------|---------------------|------------------------|------------------------|----------------------|--------------------|--------------------|
| $<-2.0$                     | $-2.0 \leq & <-1.0$ | $-1.0 \leq & <-0.5$    | $-0.5 \leq & \leq 0.5$ | $0.5 < & \leq 1.0$   | $1.0 < & \leq 2.0$ | $>2.0$             |
| Highly destabilizing        | Destabilizing       | Slightly destabilizing | Neutral                | Slightly stabilizing | Stabilizing        | Highly stabilizing |
| -                           | -                   | -                      | Y110A (-0.23)          | -                    | -                  | K76A (3.43)        |
|                             |                     |                        | W113A (-0.45)          |                      |                    |                    |
|                             |                     |                        | A114W (-0.09)          |                      |                    |                    |
|                             |                     |                        | Y129A (-0.37)          |                      |                    |                    |

**Table S2.** Prediction of protein stability change in mutants with I-Mutant.

| $\Delta\Delta G$ (kcal/mol)   |                               |                               |
|-------------------------------|-------------------------------|-------------------------------|
| $\leq -0.5$                   | $-0.5 \leq & \leq 0.5$        | $>0.5$                        |
| Decrease in protein stability | Neutral                       | Increase in protein stability |
| Y110A (-0.84)                 | K76A (-0.50)<br>A114W (-0.34) | -                             |
| W113A (-1.32)                 |                               |                               |
| Y129A (-1.76)                 |                               |                               |
